# Supplementary material for: Discovery of Noncancer Drug Effects on Survival in Electronic Health Records of Patients With Cancer: A New Paradigm for Drug Repurposing
Source: PubMed Central journal article supplement (PMC6693869; doi:10.1200/cci.19.00001), 2019-05-29
Supplement: NIHMS1041659-supplement-Supplementary_material.pdf [file NIHMS1041659-supplement-Supplementary_material.pdf]

## Supplementary Methods

*Search cancer trials for supporting evidence:* The determination of intent was ascertained from the ClinicalTrials.gov XML field(s) <primary\_outcome>; if a trial record did not contain this field, the narrative in <brief\_summary> and <detailed\_description> was also examined. The distinct drugs used in the final candidate trials (category A or B) were defined as the ground truth for our evaluation here. We compared signals detected from EHRs with the ground truth and calculated the numbers of True Positives (TP) – drugs in both detected signals and the ground truth, False Positives (FP) – drugs in detected signals but not in the ground truth, and False Negatives (FN) – drugs in the ground truth but not in our detected signals. Then we reported precision ( $TP/TP+FP$ ) and recall ( $TP/TP+FN$ ). Furthermore, to test whether our signal detection method is significantly different from the random method, we designed a permutation analysis to compare our method with random sampling, which randomly selects the same number of drugs from the 146 drugs as positives and calculates precision and recall according to the ground truth. We repeated the random sampling for 100,000 times and compared our results with random sampling results to generate the permutation *p-value*, which was used to determine whether our method is significantly better than random sampling.

### **Variables collected for multivariable Cox model**

**VUMC:** We collected a total number of 2,630 variables for each individual, including 3 patient demographics (age, biological sex, race), 2 tumor information (tumor type and stage), 1,279 diagnoses and 1,346 medications

**Mayo:** We collected a total number of 5,725 variables for each individual, including 3 patient demographics (age, biological sex, race), 2 tumor information (tumor type and stage), 1,279 diagnoses and 4,441 medications.

**Supplementary eTable 1.** All 146 candidate drugs.

|    | Drug               |
|----|--------------------|
| 1  | albuterol          |
| 2  | allopurinol        |
| 3  | aluminum hydroxide |
| 4  | amiodarone         |
| 5  | amitriptyline      |
| 6  | amlodipine         |
| 7  | amylase            |
| 8  | aripiprazole       |
| 9  | atenolol           |
| 10 | atorvastatin       |
| 11 | azathioprine       |
| 12 | azelastine         |
| 13 | baclofen           |
| 14 | benazepril         |
| 15 | bupropion          |
| 16 | bupirone           |
| 17 | captopril          |
| 18 | carbamazepine      |
| 19 | carbidopa          |
| 20 | carisoprodol       |
| 21 | carvedilol         |
| 22 | celecoxib          |
| 23 | citalopram         |
| 24 | clonidine          |
| 25 | clopidogrel        |
| 26 | colchicine         |
| 27 | cyclobenzaprine    |
| 28 | desloratadine      |
| 29 | diclofenac         |
| 30 | dicyclomine        |
| 31 | digoxin            |
| 32 | diltiazem          |
| 33 | donepezil          |
| 34 | doxazosin          |
| 35 | doxepin            |
| 36 | duloxetine         |
| 37 | enalapril          |
| 38 | enoxaparin         |

|    |                      |
|----|----------------------|
| 39 | epoetin              |
| 40 | ergocalciferol       |
| 41 | escitalopram         |
| 42 | esomeprazole         |
| 43 | estradiol            |
| 44 | estrogens            |
| 45 | eszopiclone          |
| 46 | ethinyl estradiol    |
| 47 | etodolac             |
| 48 | ezetimibe            |
| 49 | fenofibrate          |
| 50 | finasteride          |
| 51 | fluconazole          |
| 52 | fluoxetine           |
| 53 | furosemide           |
| 54 | gabapentin           |
| 55 | gemfibrozil          |
| 56 | glimepiride          |
| 57 | glipizide            |
| 58 | glyburide            |
| 59 | haloperidol          |
| 60 | hydralazine          |
| 61 | hydrochlorothiazide  |
| 62 | hydroxychloroquine   |
| 63 | hydroxyzine          |
| 64 | ibandronate          |
| 65 | indomethacin         |
| 66 | insulin              |
| 67 | insulin glargine     |
| 68 | insulin lispro       |
| 69 | ipratropium          |
| 70 | irbesartan           |
| 71 | isosorbide           |
| 72 | isosorbide dinitrate |
| 73 | ketorolac            |
| 74 | labetalol            |
| 75 | lamotrigine          |
| 76 | lansoprazole         |
| 77 | levalbuterol         |
| 78 | levetiracetam        |
| 79 | lipase               |

|     |                          |
|-----|--------------------------|
| 80  | lisinopril               |
| 81  | losartan                 |
| 82  | lovastatin               |
| 83  | mesalamine               |
| 84  | metaxalone               |
| 85  | metformin                |
| 86  | methocarbamol            |
| 87  | metoprolol               |
| 88  | metronidazole            |
| 89  | midazolam                |
| 90  | minocycline              |
| 91  | mirtazapine              |
| 92  | montelukast              |
| 93  | mycophenolate<br>mofetil |
| 94  | nabumetone               |
| 95  | niacin                   |
| 96  | nifedipine               |
| 97  | nitrofurantoin           |
| 98  | nizatidine               |
| 99  | nortriptyline            |
| 100 | olanzapine               |
| 101 | olmesartan               |
| 102 | omeprazole               |
| 103 | oxcarbazepine            |
| 104 | oxybutynin               |
| 105 | oxymetazoline            |
| 106 | pantoprazole             |
| 107 | paroxetine               |
| 108 | phenobarbital            |
| 109 | phenytoin                |
| 110 | pioglitazone             |
| 111 | pravastatin              |
| 112 | pregabalin               |
| 113 | progesterone             |
| 114 | propranolol              |
| 115 | quetiapine               |
| 116 | quinapril                |
| 117 | rabeprazole              |
| 118 | ramipril                 |
| 119 | risperidone              |

|     |                  |
|-----|------------------|
| 120 | rofecoxib        |
| 121 | ropinirole       |
| 122 | rosiglitazone    |
| 123 | rosuvastatin     |
| 124 | sertraline       |
| 125 | sildenafil       |
| 126 | simvastatin      |
| 127 | spironolactone   |
| 128 | sulfamethoxazole |
| 129 | sumatriptan      |
| 130 | tacrolimus       |
| 131 | tamsulosin       |
| 132 | testosterone     |
| 133 | timolol          |
| 134 | tiotropium       |
| 135 | tizanidine       |
| 136 | topiramate       |
| 137 | tramadol         |
| 138 | trazodone        |
| 139 | valdecoxib       |
| 140 | valproate        |
| 141 | valsartan        |
| 142 | varenicline      |
| 143 | venlafaxine      |
| 144 | verapamil        |
| 145 | warfarin         |
| 146 | zolpidem         |

**Supplementary eFigure 1.** Kaplan–Meier (K–M) plot of overall cancer survival for the 9 drugs detected from VUMC and replicated by Mayo. (K-M Plots without adjusting for other covariates)

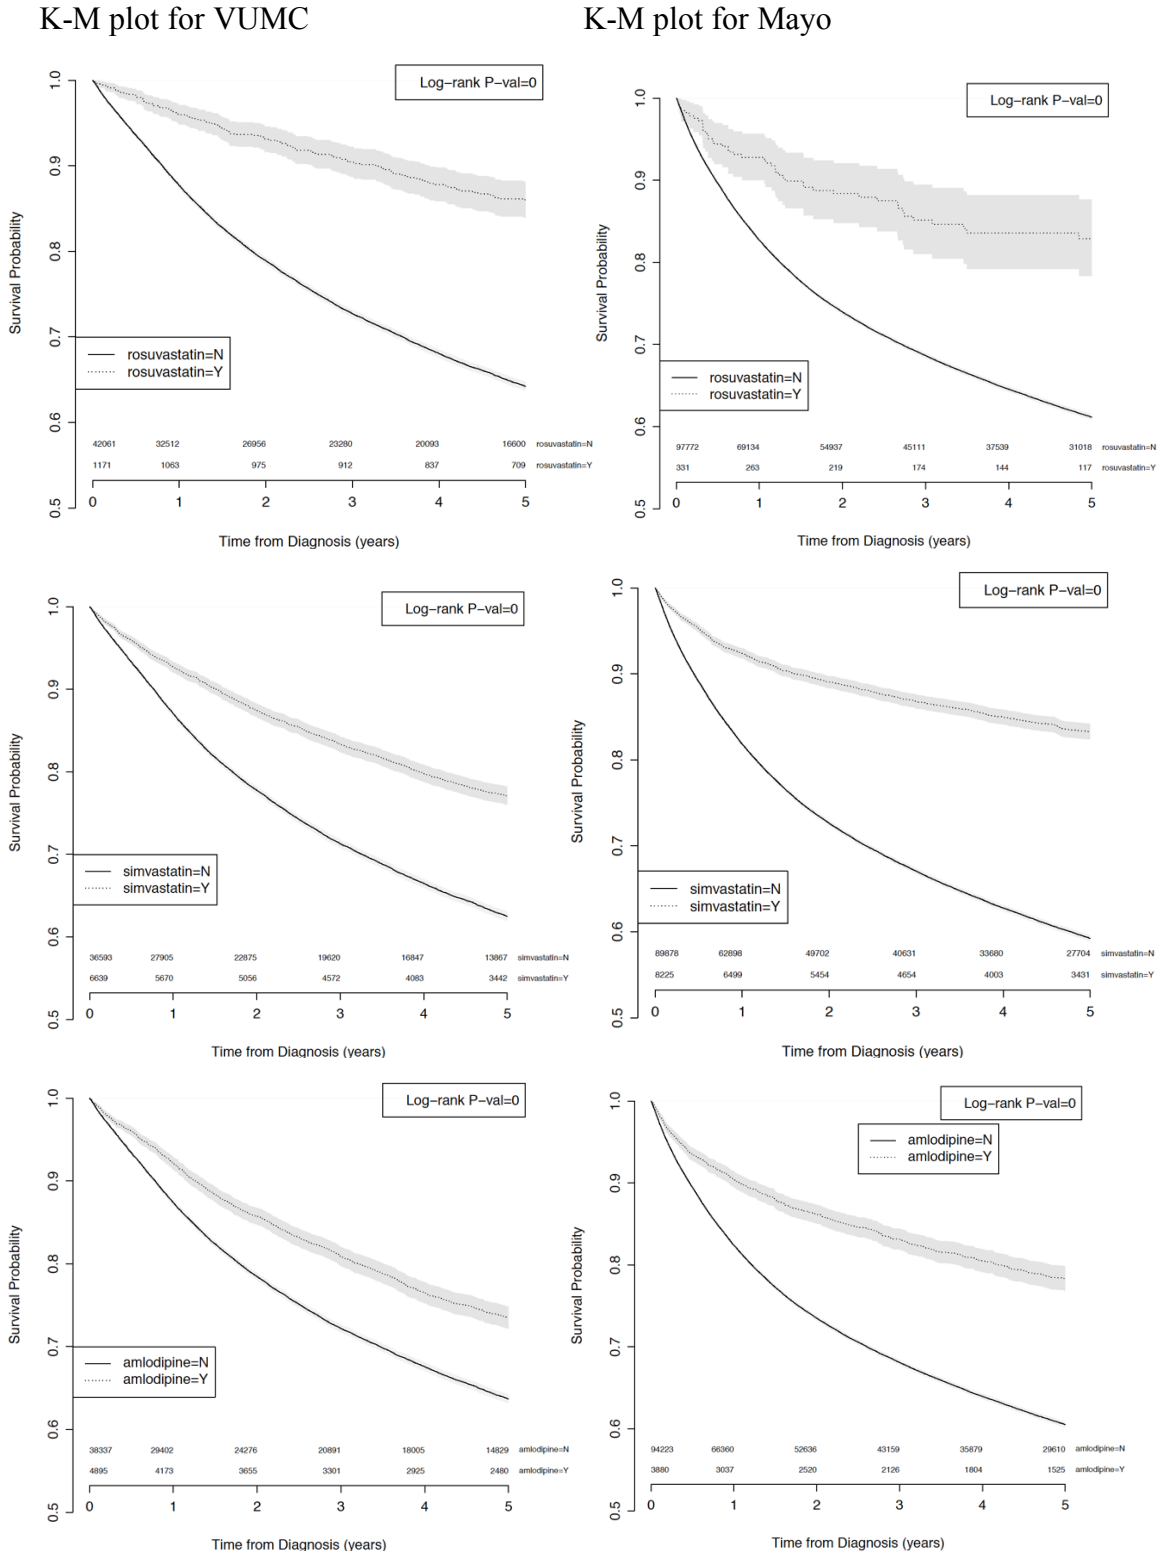

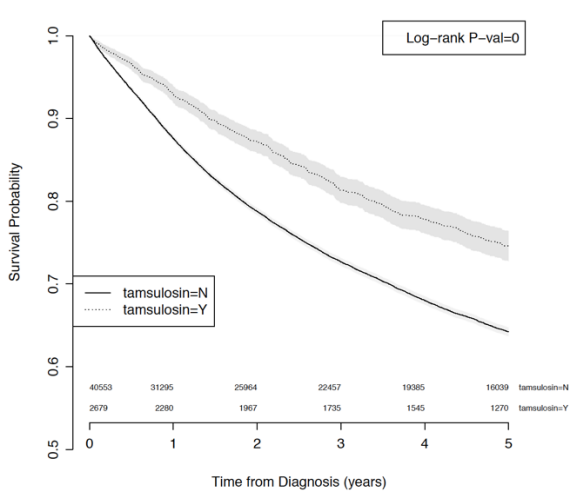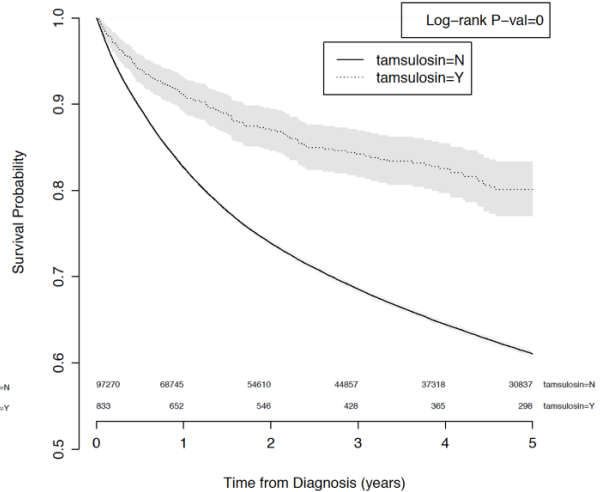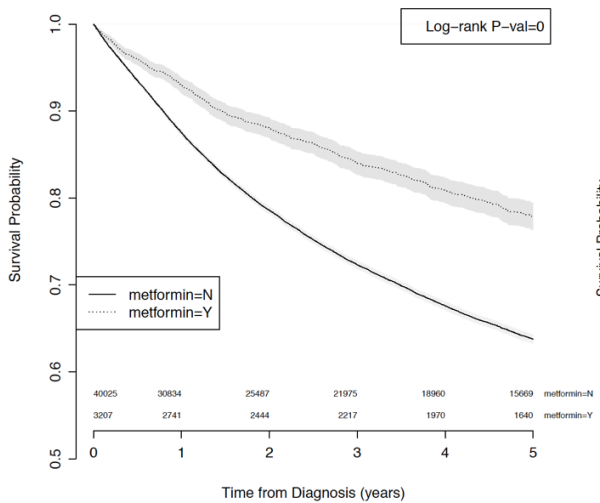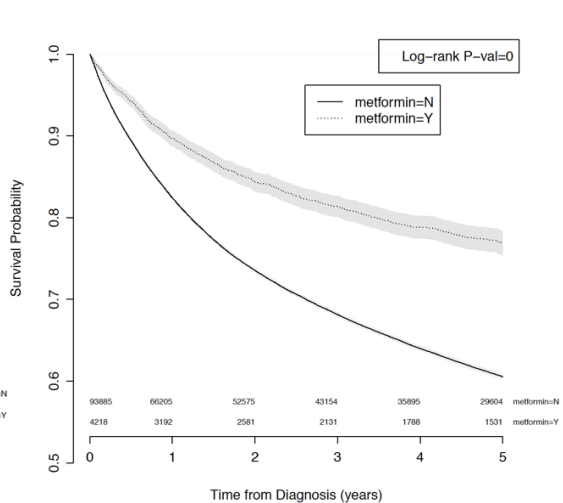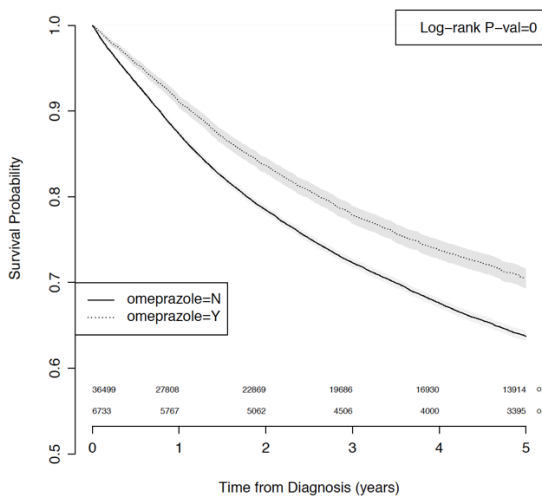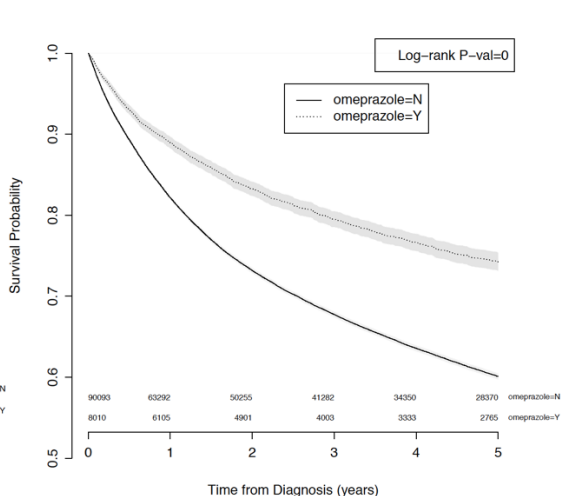



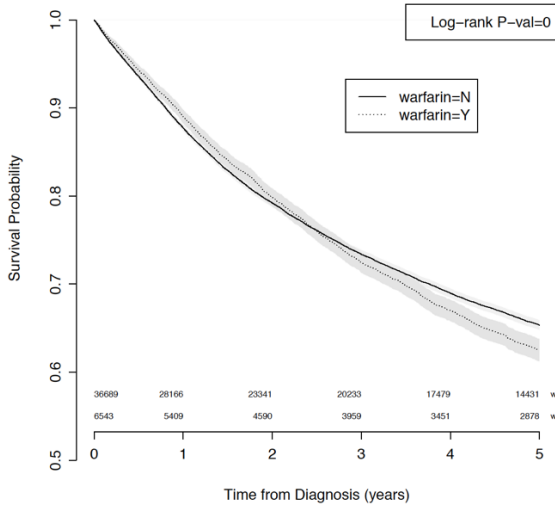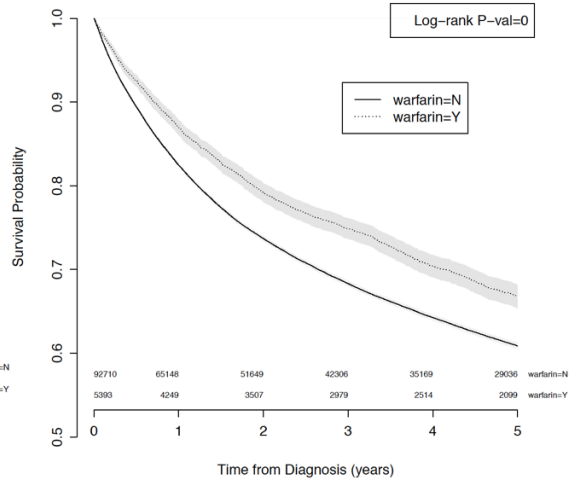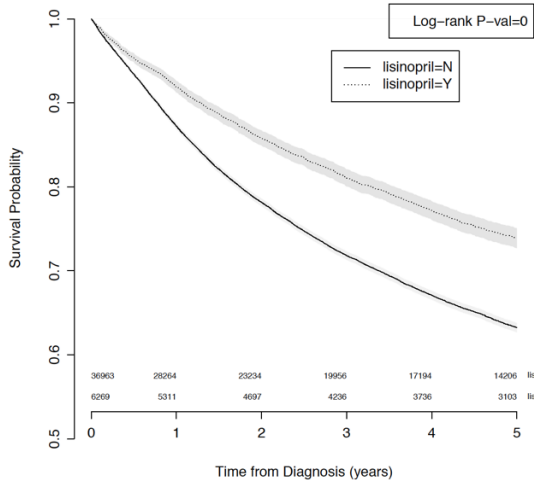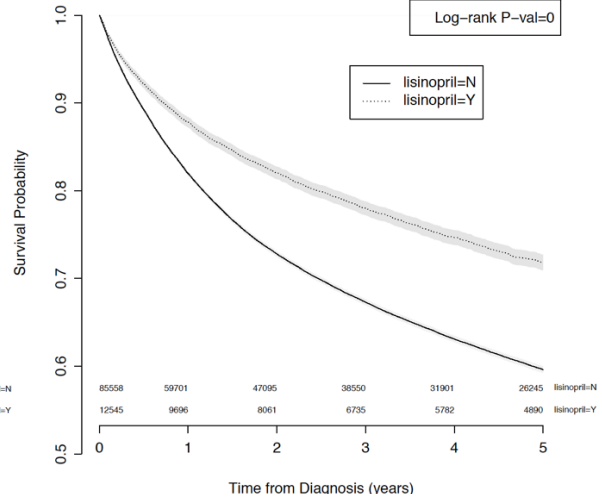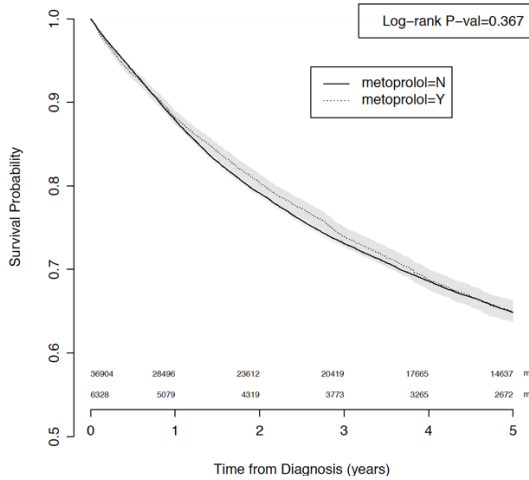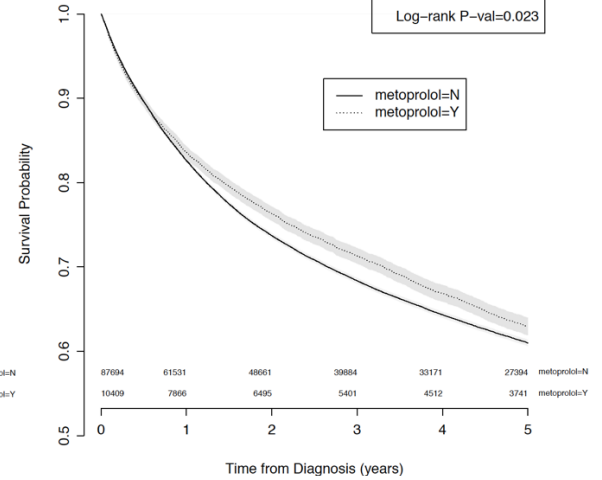

**Supplementary eFigure 2.** Permutation analysis between our method and random sampling. We compared our method with 100,000 times of random sampling. Our method outperformed random sampling with significant *p-value* of 0.04. (The vertical line represents the scores for our large-scale mining method)

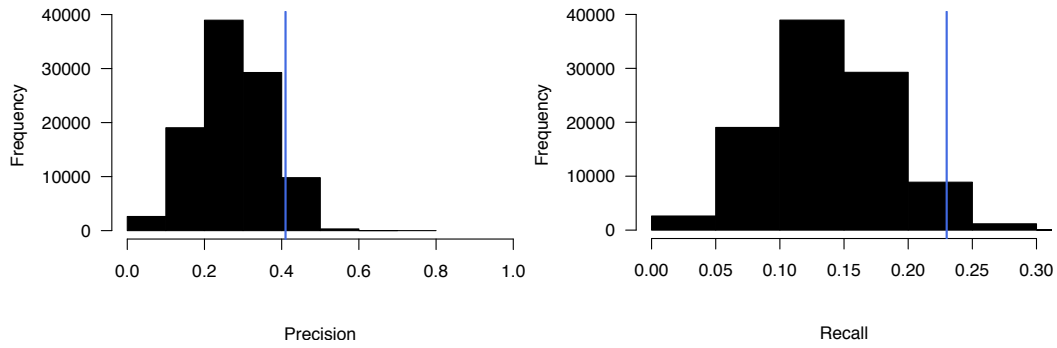

Permutation results
